19. Wang HS, Wang ZW, Yin ZT: Carvedilol for prevention of atrial fibrillation after cardiac surgery: A meta-analysis. PLoS One 2014; 9:e94005
20. Brinkman W, Herbert MA, O'Brien S, Filardo G, Prince S, Dewey T, Magee M, Ryan W, Mack M: Preoperative  $\beta$ -blocker use in coronary artery bypass grafting surgery: National database analysis. JAMA Intern Med 2014; 174:1320–7
21. Zhang H, Yuan X, Zhang H, Chen S, Zhao Y, Hua K, Rao C, Wang W, Sun H, Hu S, Zheng Z: Efficacy of long-term  $\beta$ -blocker therapy for secondary prevention of long-term outcomes after coronary artery bypass grafting surgery. Circulation 2015; 131:2194–201
22. Venkatesan S, Okoli GN, Mozid AM, Pickworth TW, Grocott MP, Sanders RD, Myles P: Effects of five preoperative cardiovascular drugs on mortality after coronary artery bypass surgery: A retrospective analysis of an observational study of 16,192 patients. Eur J Anaesthesiol 2016; 33:49–57

## ANESTHESIOLOGY REFLECTIONS FROM THE WOOD LIBRARY-MUSEUM

### George Brett and His Brettometer: The Anesthesia Machine or the Slugging Machine?

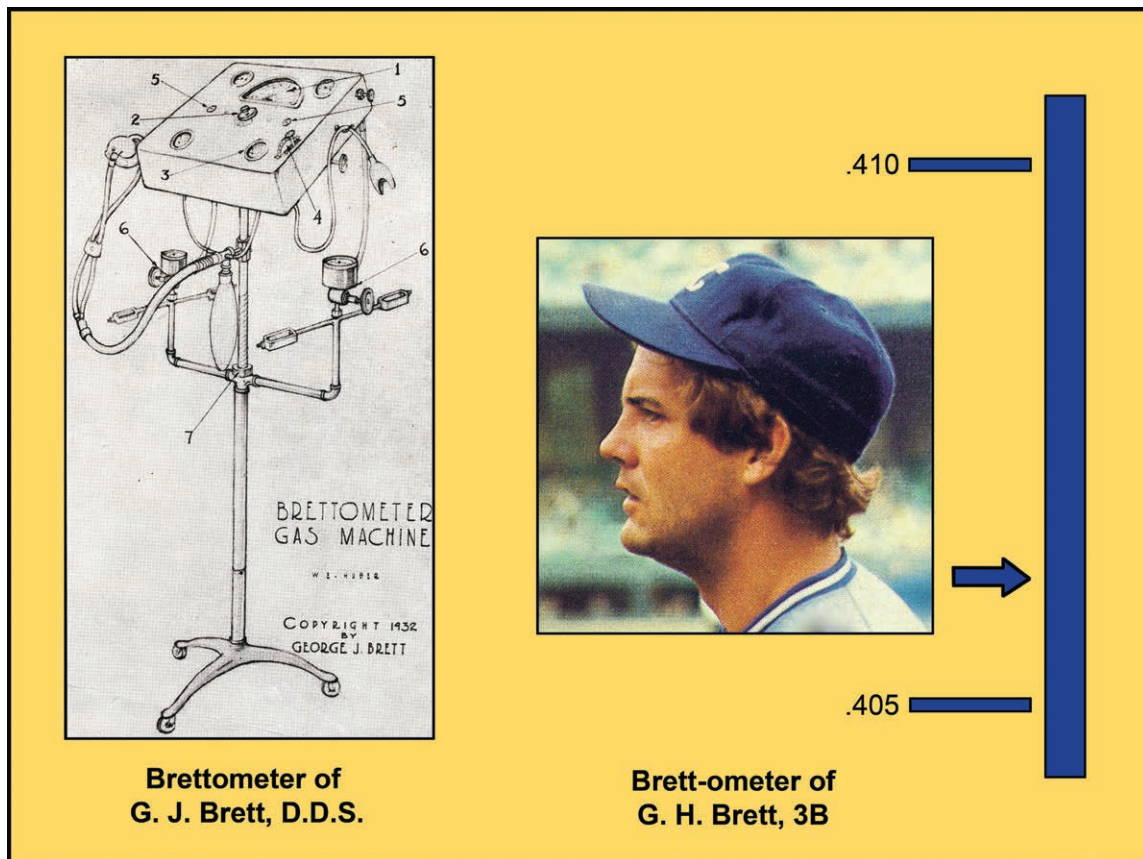

In 1932, the U.S. patent office granted Dr. George Jesse Brett (1896 to 1969) patent rights to his Anaesthetizer, which he manufactured as an anesthesia machine branded “Brettometer” (left). Forty-eight years after that patent, a Kansas City Royals third-baseman, George Brett, was intermittently topping a batting average of .400. Soon, many American newspapers began following baseballer Brett with daily “Brett-ometer” or “Brettometer” charts (right) detailing where the slugger’s batting average stood on that given day. So remarkably, the twentieth century ushered in two unrelated gentlemen named George Brett, each of whom was responsible for his own well publicized Brettometer. (Copyright © the American Society of Anesthesiologists’ Wood Library-Museum of Anesthesiology.)

*George S. Bause, M.D., M.P.H., Clinical Associate Professor, Case Western Reserve University, Cleveland, Ohio.*
